# Supplementary figures and images for: In Vitro Activity and Atom Pair Fingerprint Analysis of Potent Hits from Malaria Box against Staphylococcus aureus Isolated from Cows with Clinical Mastitis
Source: MDPI journal article supplement (doi:10.3390/dairy4040049), 2023-12-14

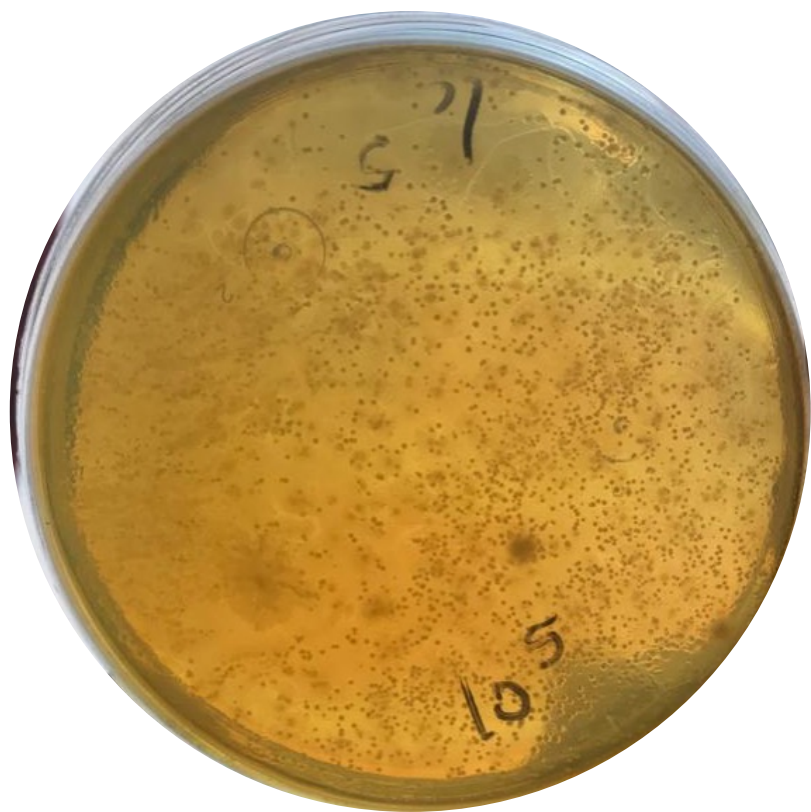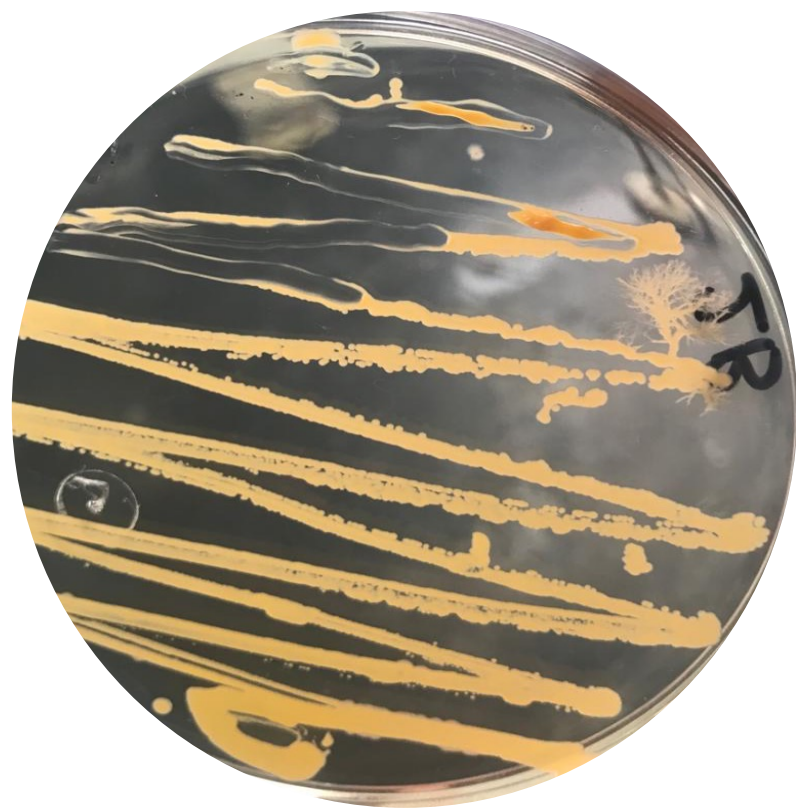

Fig. S1

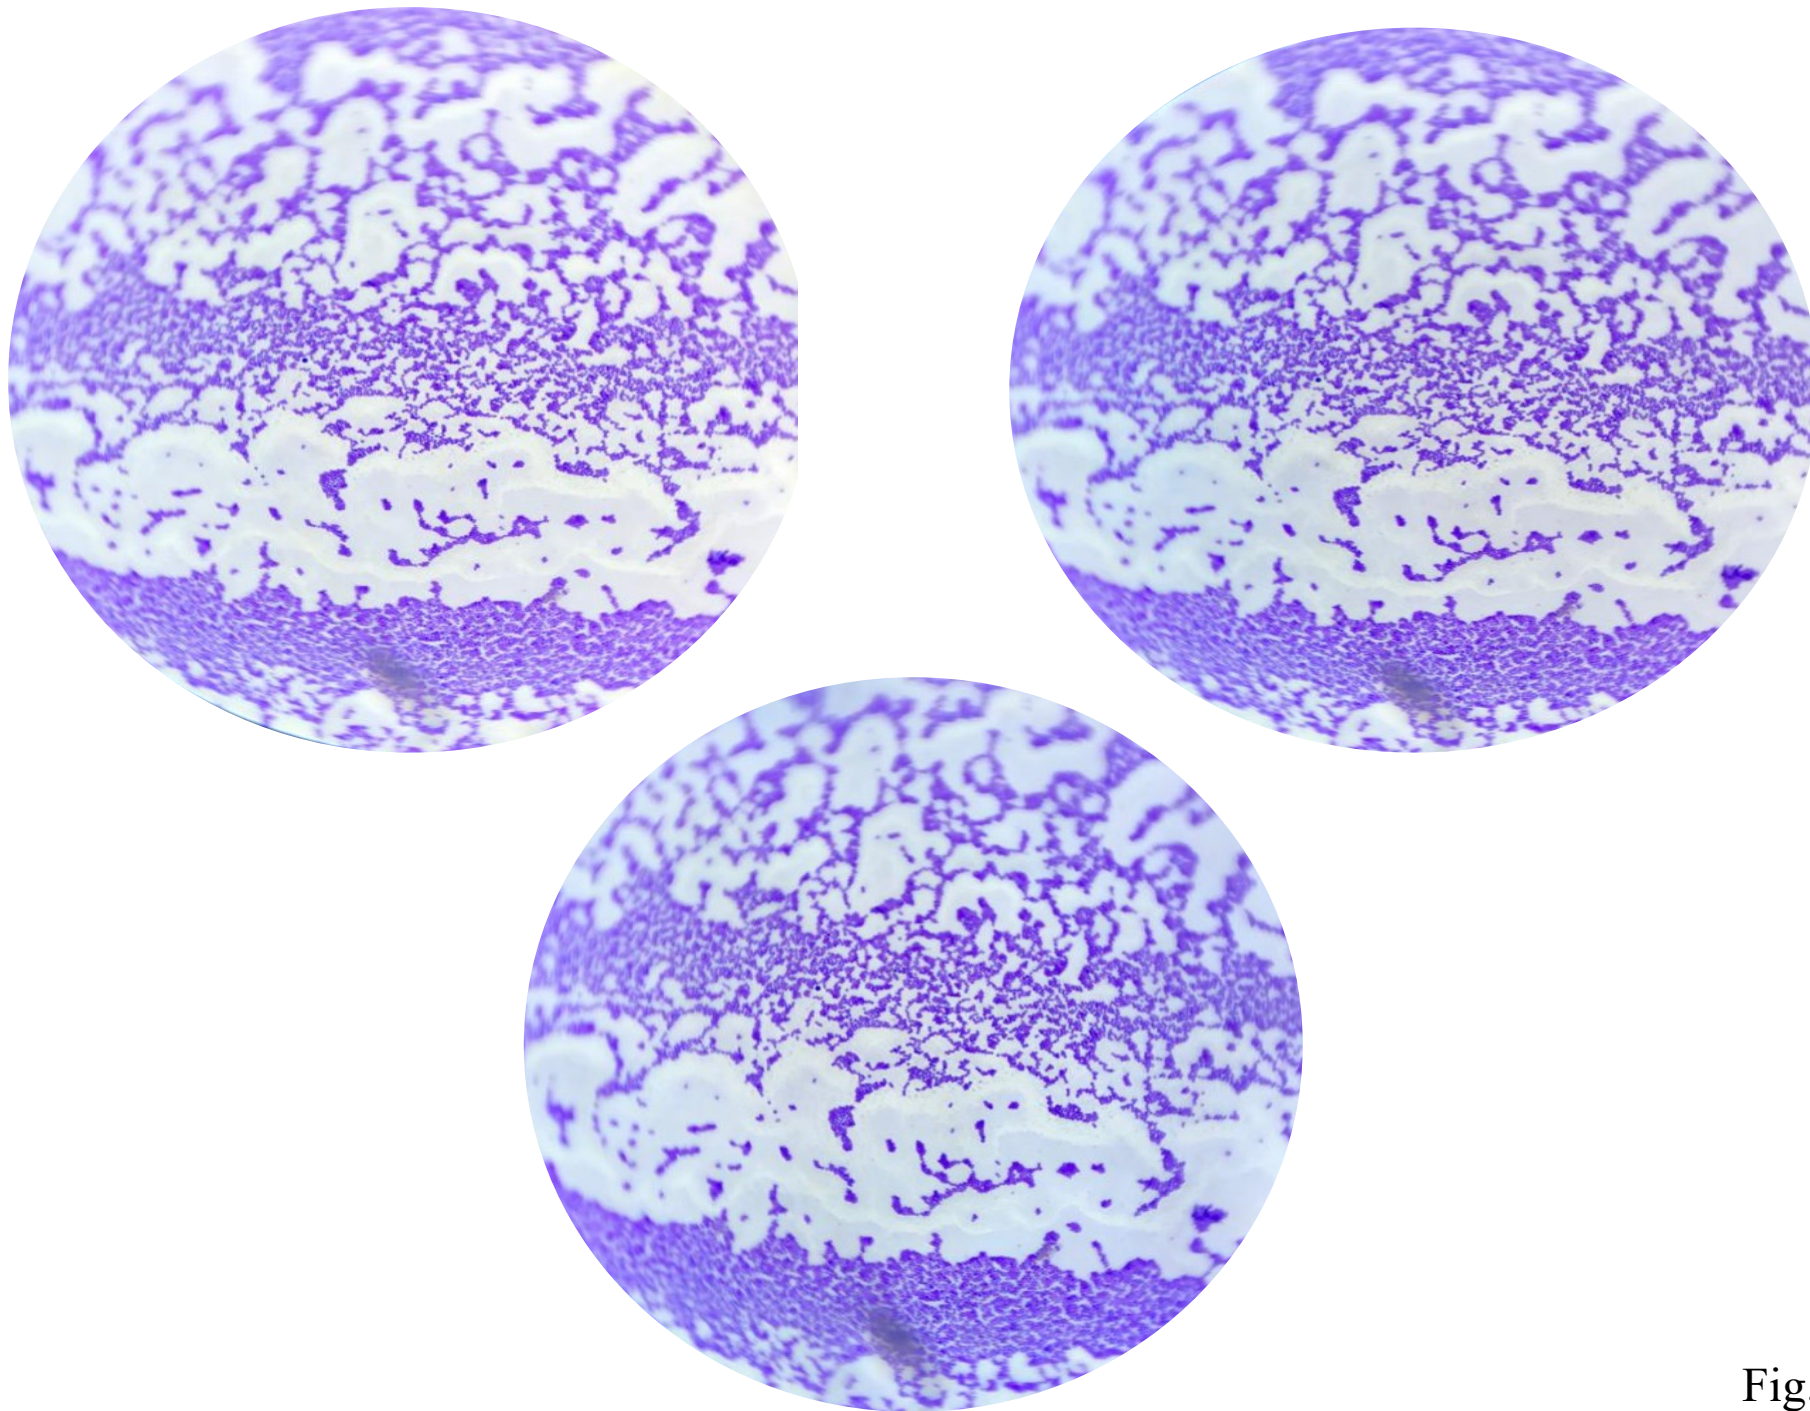

Fig. S2

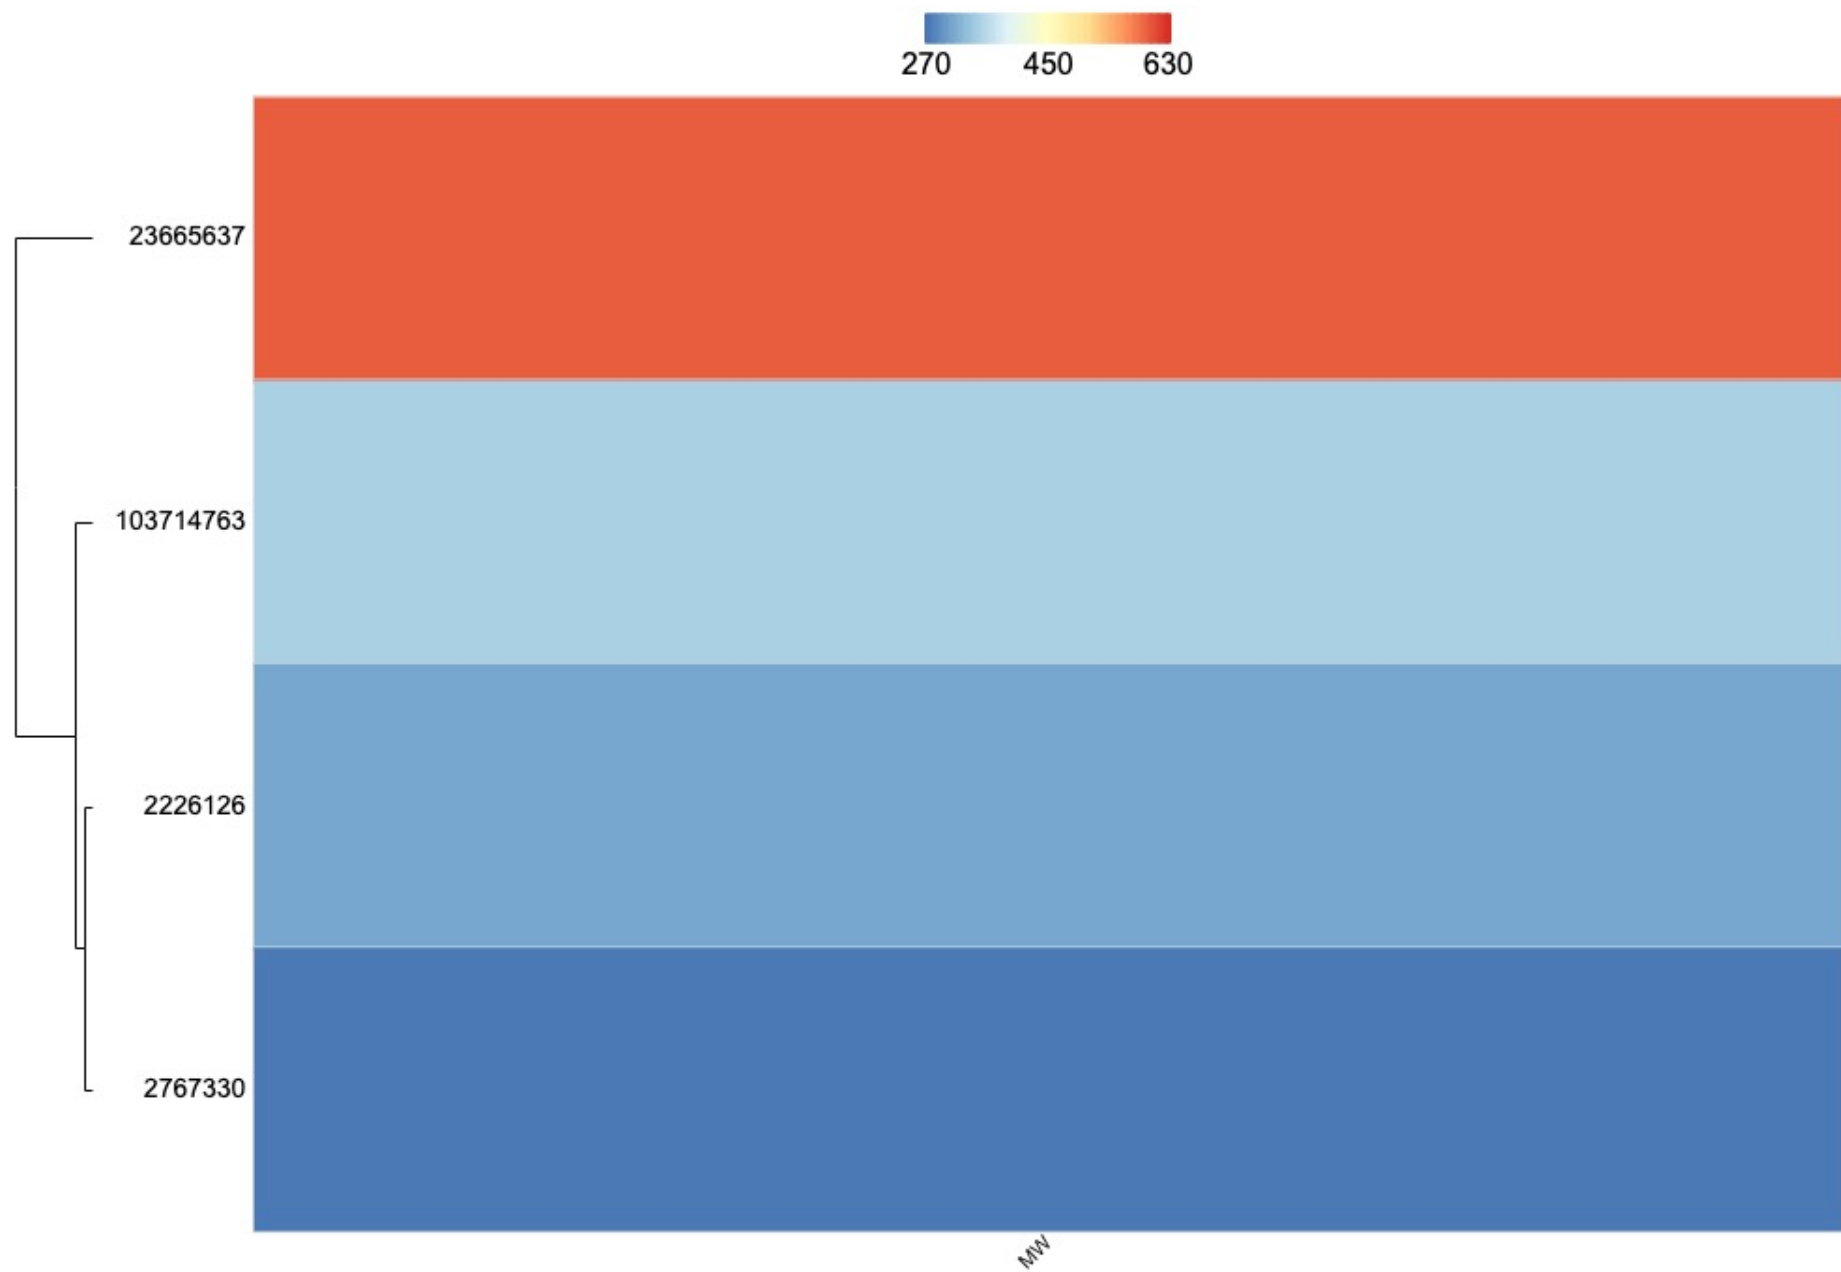

Fig. S3

Supplement: s1 [file s1]
